# Supplementary material
Source: MDPI journal article supplement (https://www.mdpi.com/2073-4352/13/7/1101)
Supplement: s1 [file s1]

## Supplementary Materials

### Completion of Crystallographic Data for the Series of 4-Halogenated-1*H*-Pyrazoles: Crystal Structure Determination of 4-Iodo-1*H*-Pyrazole and Spectroscopic Comparison

Kelly L. Rue, Susana Herrera, Indranil Chakraborty, Alexander M. Mebel and Raphael G. Raptis

**Table S1.** Crystal data refinement parameters for 4-I-pzH in the  $P2_1ab$  space group.

|                                        | <b>4-I-pzH</b>                                |
|----------------------------------------|-----------------------------------------------|
| Formula                                | C <sub>3</sub> H <sub>3</sub> IN <sub>2</sub> |
| D <sub>calc.</sub> /g cm <sup>-3</sup> | 2.561                                         |
| μ/mm <sup>-1</sup>                     | 6.21                                          |
| <i>M<sub>r</sub></i>                   | 193.97                                        |
| T/K                                    | 170                                           |
| Crystal System                         | Orthorhombic                                  |
| Space group                            | $P2_1ab$ (No. 29)                             |
| <i>a</i> /Å                            | 5.5309(6)                                     |
| <i>b</i> /Å                            | 6.9477(8)                                     |
| <i>c</i> /Å                            | 13.0940(14)                                   |
| <i>V</i> /Å <sup>3</sup>               | 503.16(10)                                    |
| <i>Z</i>                               | 4                                             |
| Measured Refl.                         | 7789                                          |
| Independent Refl.                      | 1239                                          |
| <i>R</i> <sub>int</sub>                | 0.028                                         |
| Parameters                             | 55                                            |
| <sup>a</sup> GooF                      | 1.16                                          |
| <sup>b</sup> w <i>R</i> <sub>2</sub>   | 0.148                                         |
| <sup>c</sup> <i>R</i> <sub>1</sub>     | 0.069                                         |

<sup>a</sup> GooF =  $[\sum[w(F_o^2 - F_c^2)^2]/(N_o - N_v)]^{1/2}$  ( $N_o$  = number of observations,  $N_v$  = number of variables)

<sup>b</sup> w*R*<sub>2</sub> =  $\sum||F_o| - |F_c|| / \sum|F_o|$

<sup>c</sup> *R*<sub>1</sub> =  $[\sum w(F_o^2 - F_c^2)^2 / \sum|F_o|^2]^{1/2}$

a) 4-F-pzH

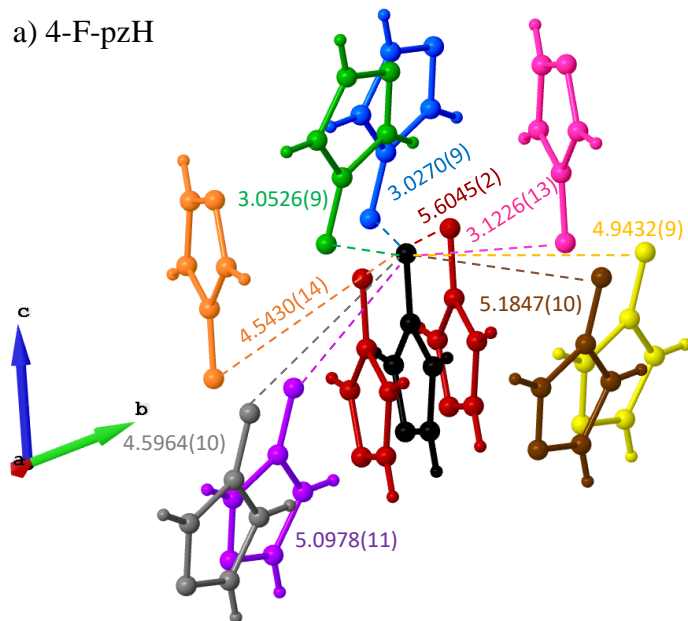

b) 4-I-pzH

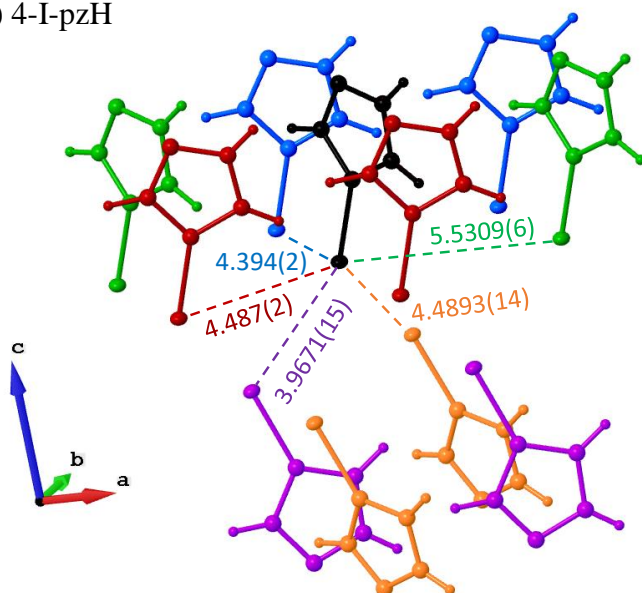

**Figure S1.** Perspective view showing nearest neighbors of the central molecule (black) for (a) 4-F-pzH and (b) 4-I-pzH. Individual molecules and their corresponding distance from the central molecule are color coded to match.

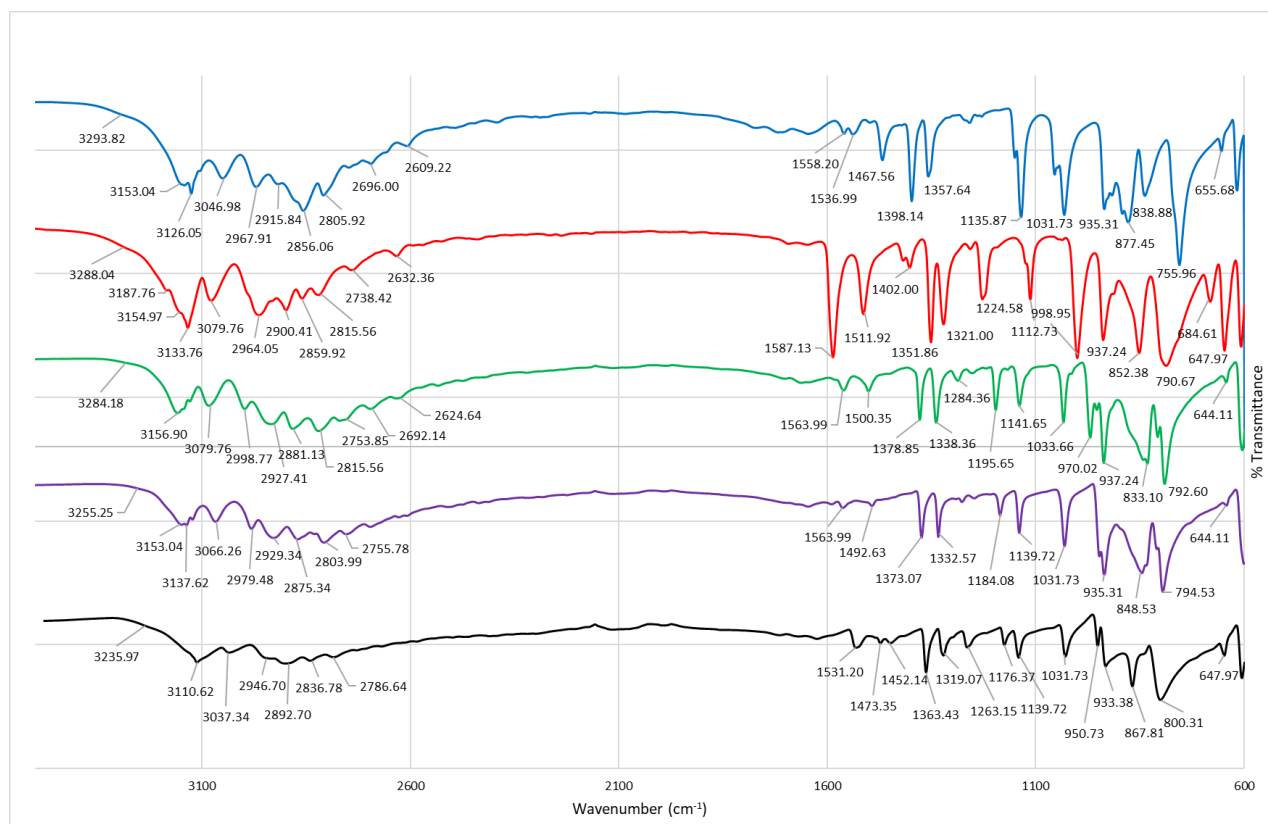

**Figure S2.** Annotated IR spectra of simple pyrazole and 4-X-pyrazole (where X = F, Cl, Br, I).

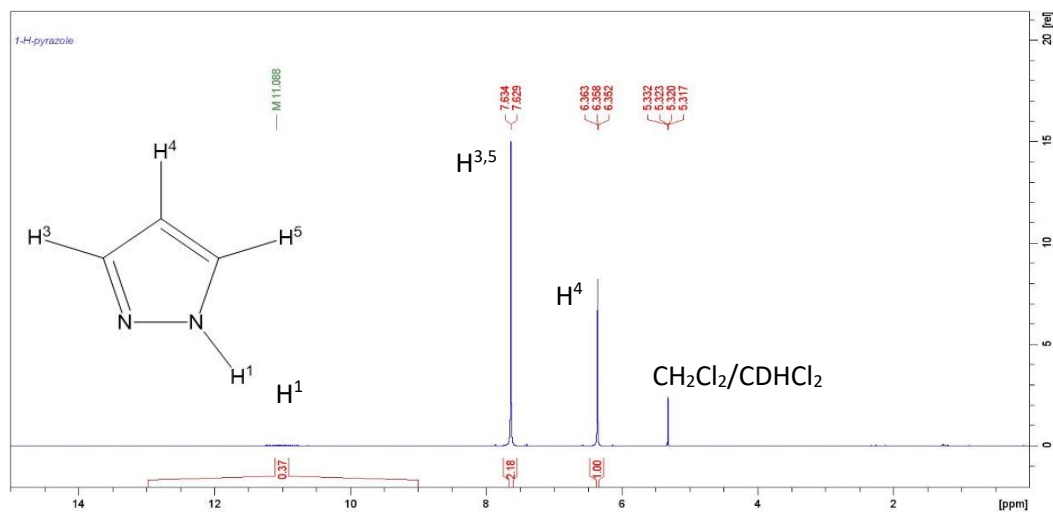

**Figure S3.** Full 400 MHz  $^1\text{H}$  NMR spectrum of 4-F-pyrazole in  $\text{CD}_2\text{Cl}_2$

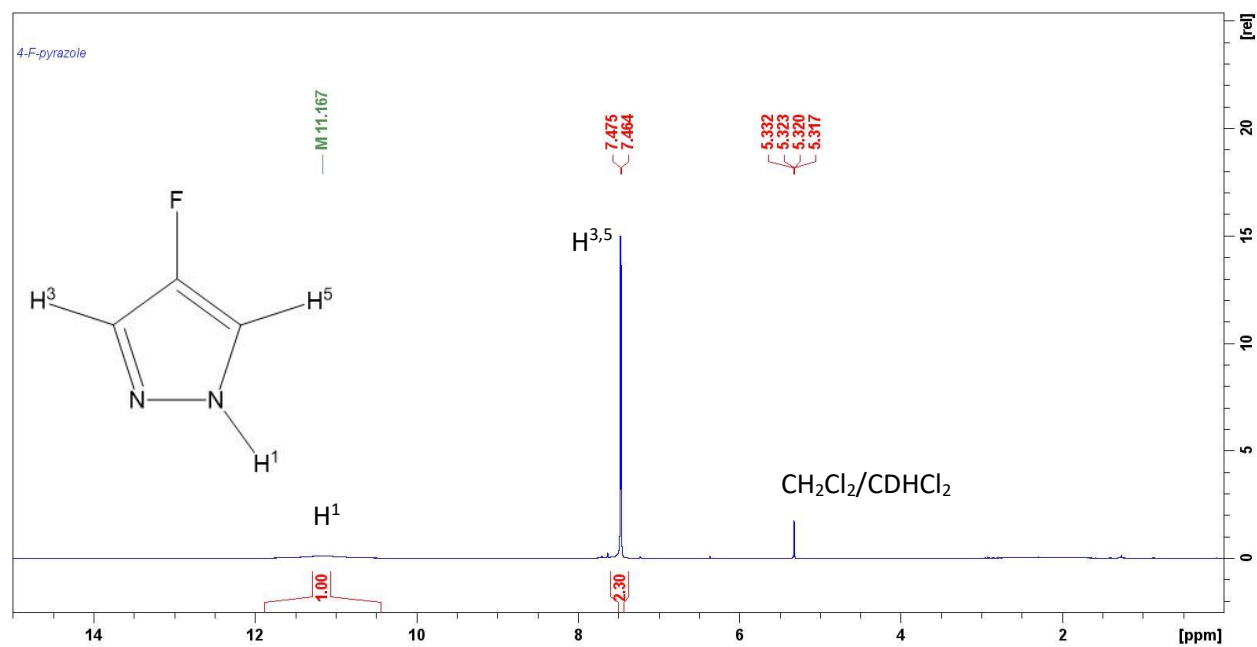

**Figure S4.** Full 400 MHz <sup>1</sup>H NMR spectrum of 4-F-pyrazole in CD<sub>2</sub>Cl<sub>2</sub>

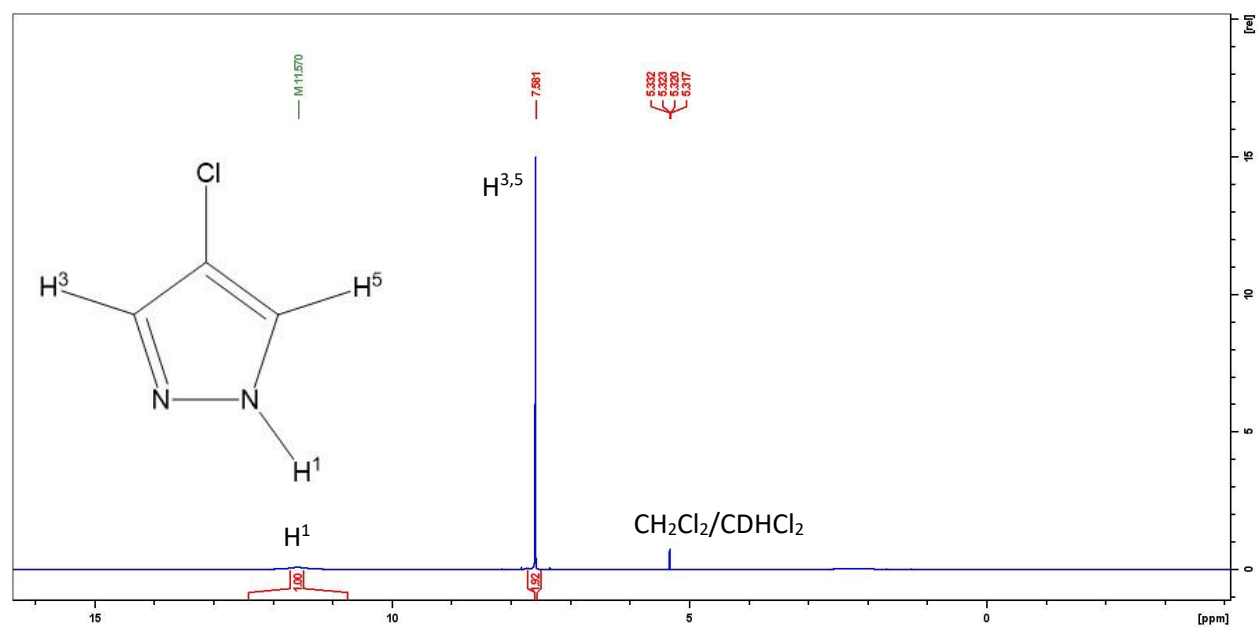

**Figure S5.** Full 400 MHz <sup>1</sup>H NMR spectrum of 4-Cl-pyrazole in CD<sub>2</sub>Cl<sub>2</sub>

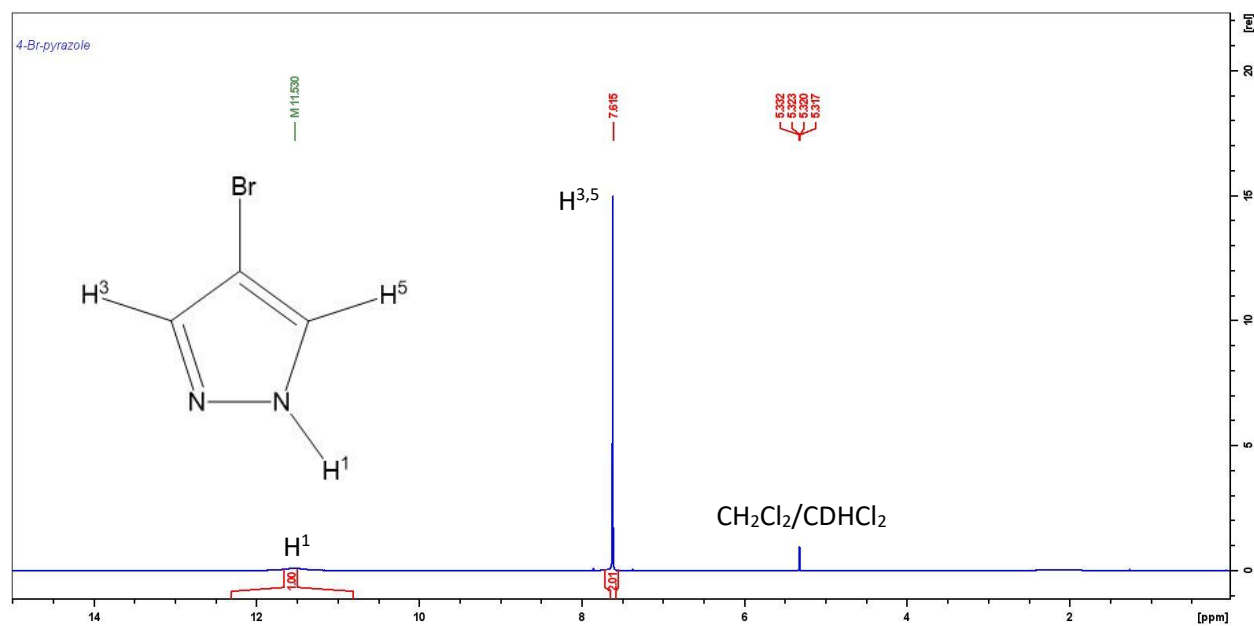

**Figure S6.** Full 400 MHz <sup>1</sup>H NMR spectrum of 4-Br-pyrazole in CD<sub>2</sub>Cl<sub>2</sub>

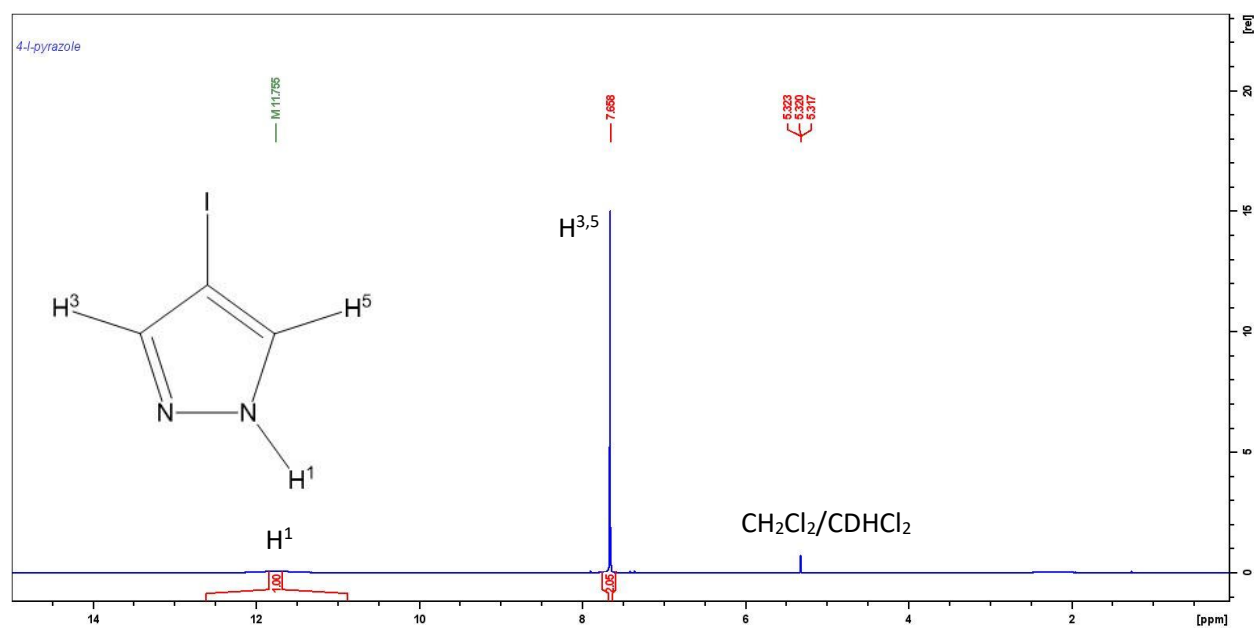

**Figure S7.** Full 400 MHz <sup>1</sup>H NMR spectrum of 4-I-pyrazole in CD<sub>2</sub>Cl<sub>2</sub>
